# Supplementary material
Source: publisher figshare collection journal article supplement (https://acs.figshare.com/ndownloader/files/4579273)
Supplement: Supplementary file 1 [file 4579273]

data_Na4.24K1.76ZnSn2 

_publ_contact_author         'Thomas F. Faessler'
_publ_contact_author_email   'thomas.faessler@lrz.tum.de'
_publ_contact_author_fax      '++49-89 28913186'
_publ_contact_author_phone    '++49-89 28913131'
_publ_requested_journal       'J. Am. Chem. Soc.'

loop_
  _publ_author_name
  _publ_author_address
 'Sung-Jin Kim'
; Technische Universitaet Muenchen
  Department Chemie
  Lehrstuhl fuer Anorganische Chemie mit Schwerpunkt Neue Materialien
  Lichtenbergstrasse 4
  D-85747 Garching
  Germany
;

 'Florian Kraus'
; Technische Universitaet Muenchen
  Department Chemie
  Lehrstuhl fuer Anorganische Chemie mit Schwerpunkt Neue Materialien
  Lichtenbergstrasse 4
  D-85747 Garching
  Germany
;

 'Thomas F. Faessler'
; Technische Universitaet Muenchen
  Department Chemie
  Lehrstuhl fuer Anorganische Chemie mit Schwerpunkt Neue Materialien
  Lichtenbergstrasse 4
  D-85747 Garching
  Germany
;
 
_audit_creation_method            SHELXL-97 
_chemical_name_systematic 
; 
 ? 
; 
_chemical_name_common             ? 
_chemical_melting_point           'not measured' 
_chemical_formula_moiety          ? 
_chemical_formula_sum 
 'K1.76 Na4.24 Sn2 Zn' 
_chemical_formula_weight          469.12 
 
loop_ 
 _atom_type_symbol 
 _atom_type_description 
 _atom_type_scat_dispersion_real 
 _atom_type_scat_dispersion_imag 
 _atom_type_scat_source 
 'Na'  'Na'   0.0362   0.0249 
 'International Tables Vol C Tables 4.2.6.8 and 6.1.1.4' 
 'K'  'K'   0.2009   0.2494 
 'International Tables Vol C Tables 4.2.6.8 and 6.1.1.4' 
 'Zn'  'Zn'   0.2839   1.4301 
 'International Tables Vol C Tables 4.2.6.8 and 6.1.1.4' 
 'Sn'  'Sn'  -0.6537   1.4246 
 'International Tables Vol C Tables 4.2.6.8 and 6.1.1.4' 
 
_symmetry_cell_setting            monoclinic
_symmetry_space_group_name_H-M    P21/c
 
loop_ 
 _symmetry_equiv_pos_as_xyz 
 'x, y, z' 
 '-x, y+1/2, -z+1/2' 
 '-x, -y, -z' 
 'x, -y-1/2, z-1/2' 
 
_cell_length_a                    11.5716(5) 
_cell_length_b                    9.8617(2) 
_cell_length_c                    11.3820(4) 
_cell_angle_alpha                 90.00 
_cell_angle_beta                  119.334(5) 
_cell_angle_gamma                 90.00 
_cell_volume                      1132.32(7) 
_cell_formula_units_Z             4 
_cell_measurement_temperature     293(2) 
_cell_measurement_reflns_used     6764 
_cell_measurement_theta_min       2.8787
_cell_measurement_theta_max       27.7498
 
_exptl_crystal_description        fragment
_exptl_crystal_colour             'dark metallic' 
_exptl_crystal_size_max           0.05 
_exptl_crystal_size_mid           0.05
_exptl_crystal_size_min           0.05
_exptl_crystal_density_meas       ? 
_exptl_crystal_density_diffrn     2.752 
_exptl_crystal_density_method     'not measured' 
_exptl_crystal_F_000              840 
_exptl_absorpt_coefficient_mu     7.215 
_exptl_absorpt_correction_type    'multi-scan' 
_exptl_absorpt_correction_T_min   0.54192
_exptl_absorpt_correction_T_max   1.00000
_exptl_absorpt_process_details     
;
 CrysAlis RED, Oxford Diffraction Ltd.,
 Version 1.171.29.9 (release 23-03-2006 CrysAlis171 .NET)
 (compiled Mar 23 2006,23:39:28)
 Empirical absorption correction using spherical harmonics,
 implemented in SCALE3 ABSPACK scaling algorithm.
;
_exptl_special_details 
; 
scanspeed                           2 x 30 s per film
repetition                                 1
dx                                        50
776 films measured in 5 data sets
set 1 to 4 omega-scans with delta_omega = 1.00
set 5 phi-scan with delta_phi = 1.00
;

_publ_section_exptl_prep         
;
The crystal was fixed in a capillary and
transferred to the diffractometer.
;

_publ_section_exptl_refinement   
;
Straight forward after integration with the program CrysAlis RED,
source: Oxford Diffraction Ltd., Version 1.171.29.9, 2006
; 
 
_diffrn_ambient_temperature       293(2) 
_diffrn_radiation_wavelength      0.71073 
_diffrn_radiation_type            MoK\a 
_diffrn_radiation_source          'Enhance (Mo) X-ray Source'
_diffrn_radiation_monochromator   graphite 

_diffrn_measurement_device       ' \k-geometry diffractometer '
_diffrn_measurement_device_type  ' Oxford-Diffraction Xcalibur3 ' 
_diffrn_measurement_method       ' phi- and omega-rotation '
_diffrn_detector                 ' CCD plate '
_diffrn_detector_area_resol_mean  16.0238 
_diffrn_standards_decay_%         0 

_diffrn_reflns_number             15918 
_diffrn_reflns_av_R_equivalents   0.0406 
_diffrn_reflns_av_sigmaI/netI     0.0346 
_diffrn_reflns_limit_h_min        -14 
_diffrn_reflns_limit_h_max        15 
_diffrn_reflns_limit_k_min        -12 
_diffrn_reflns_limit_k_max        12 
_diffrn_reflns_limit_l_min        -14 
_diffrn_reflns_limit_l_max        14 
_diffrn_reflns_theta_min          2.89 
_diffrn_reflns_theta_max          27.85 
_reflns_number_total              2671 
_reflns_number_gt                 1961 
_reflns_threshold_expression      >2sigma(I) 
 
_computing_data_collection
;
CrysAlis CCD, Oxford Diffraction Ltd.,
Version 1.171.29.9 (release 23-03-2006 CrysAlis171 .NET)
(compiled Mar 23 2006,23:39:28)
;
_computing_cell_refinement
;
CrysAlis RED, Oxford Diffraction Ltd.,
Version 1.171.29.9 (release 23-03-2006 CrysAlis171 .NET)
(compiled Mar 23 2006,23:39:28)
;
_computing_data_reduction
;
CrysAlis RED, Oxford Diffraction Ltd.,
Version 1.171.29.9 (release 23-03-2006 CrysAlis171 .NET)
(compiled Mar 23 2006,23:39:28)
;
_computing_structure_solution     'SHELXS-97 (Sheldrick, 1997)' 
_computing_structure_refinement   'SHELXL-97 (Sheldrick, 1997)' 
 
_refine_special_details
; 
 Refinement of F^2^ against ALL reflections.  The weighted R-factor wR and 
 goodness of fit S are based on F^2^, conventional R-factors R are based 
 on F, with F set to zero for negative F^2^. The threshold expression of 
 F^2^ > 2sigma(F^2^) is used only for calculating R-factors(gt) etc. and is 
 not relevant to the choice of reflections for refinement.  R-factors based 
 on F^2^ are statistically about twice as large as those based on F, and R- 
 factors based on ALL data will be even larger. 
; 
 
_refine_ls_structure_factor_coef  Fsqd  
_refine_ls_matrix_type            full 
_refine_ls_weighting_scheme       calc  
_refine_ls_weighting_details 
 'calc w=1/[\s^2^(Fo^2^)+(0.0374P)^2^+0.0000P] where P=(Fo^2^+2Fc^2^)/3' 
_atom_sites_solution_primary      direct 
_atom_sites_solution_secondary    difmap 
_atom_sites_solution_hydrogens    geom 
_refine_ls_hydrogen_treatment     mixed 
_refine_ls_extinction_method      SHELXL 
_refine_ls_extinction_coef        0.00017(16) 
_refine_ls_extinction_expression 
 'Fc^*^=kFc[1+0.001xFc^2^\l^3^/sin(2\q)]^-1/4^' 
_refine_ls_number_reflns          2671 
_refine_ls_number_parameters      84 
_refine_ls_number_restraints      0 
_refine_ls_R_factor_all           0.0452 
_refine_ls_R_factor_gt            0.0288 
_refine_ls_wR_factor_ref          0.0668 
_refine_ls_wR_factor_gt           0.0615 
_refine_ls_goodness_of_fit_ref    0.986 
_refine_ls_restrained_S_all       0.986 
_refine_ls_shift/su_max           0.001 
_refine_ls_shift/su_mean          0.000 
 
loop_ 
 _atom_site_label 
 _atom_site_type_symbol 
 _atom_site_fract_x 
 _atom_site_fract_y 
 _atom_site_fract_z 
 _atom_site_U_iso_or_equiv 
 _atom_site_adp_type 
 _atom_site_occupancy 
 _atom_site_symmetry_multiplicity 
 _atom_site_calc_flag 
 _atom_site_refinement_flags 
 _atom_site_disorder_assembly 
 _atom_site_disorder_group 
Sn1 Sn 0.33973(3) 0.72375(3) 0.07875(3) 0.03306(11) Uani 1 1 d . . . 
Sn2 Sn 0.14852(3) 1.19224(3) -0.11478(3) 0.03604(11) Uani 1 1 d . . . 
Zn Zn 0.25647(5) 0.96483(5) -0.01147(6) 0.03781(15) Uani 1 1 d . . . 
K1 K 0.32426(13) 0.39132(13) 0.20358(13) 0.0471(5) Uani 0.766(11) 1 d P . . 
Na1 Na 0.32426(13) 0.39132(13) 0.20358(13) 0.0471(5) Uani 0.234(11) 1 d P . . 
K2 K 0.64470(12) 0.53329(13) 0.18278(12) 0.0517(3) Uani 1 1 d . . . 
Na2 Na 0.50717(19) 0.8222(2) -0.0737(2) 0.0497(5) Uani 1 1 d . . . 
Na3 Na 0.16829(19) 0.7224(2) 0.2382(2) 0.0477(5) Uani 1 1 d . . . 
Na4 Na 0.0766(2) 1.5241(2) -0.1213(2) 0.0532(5) Uani 1 1 d . . . 
Na5 Na 0.0112(2) 1.3404(2) -0.4231(2) 0.0547(6) Uani 1 1 d . . . 
 
loop_ 
 _atom_site_aniso_label 
 _atom_site_aniso_U_11 
 _atom_site_aniso_U_22 
 _atom_site_aniso_U_33 
 _atom_site_aniso_U_23 
 _atom_site_aniso_U_13 
 _atom_site_aniso_U_12 
Sn1 0.03434(19) 0.03473(18) 0.03150(18) 0.00399(13) 0.01720(14) 0.00334(14) 
Sn2 0.03333(19) 0.0388(2) 0.03545(19) 0.00571(13) 0.01641(14) 0.00577(14) 
Zn 0.0403(3) 0.0310(3) 0.0393(3) 0.0003(2) 0.0173(3) -0.0012(2) 
K1 0.0539(9) 0.0429(8) 0.0480(8) 0.0048(6) 0.0278(7) 0.0012(6) 
Na1 0.0539(9) 0.0429(8) 0.0480(8) 0.0048(6) 0.0278(7) 0.0012(6) 
K2 0.0529(7) 0.0491(7) 0.0549(7) 0.0056(5) 0.0278(6) 0.0084(6) 
Na2 0.0444(12) 0.0582(14) 0.0463(12) -0.0003(10) 0.0220(10) -0.0067(10) 
Na3 0.0402(11) 0.0626(14) 0.0403(11) -0.0002(9) 0.0196(9) 0.0042(10) 
Na4 0.0551(13) 0.0488(12) 0.0561(13) 0.0007(10) 0.0277(11) -0.0006(10) 
Na5 0.0496(13) 0.0723(15) 0.0427(12) 0.0031(11) 0.0231(10) 0.0045(11) 
 
_geom_special_details 
; 
 All esds (except the esd in the dihedral angle between two l.s. planes) 
 are estimated using the full covariance matrix.  The cell esds are taken 
 into account individually in the estimation of esds in distances, angles 
 and torsion angles; correlations between esds in cell parameters are only 
 used when they are defined by crystal symmetry.  An approximate (isotropic) 
 treatment of cell esds is used for estimating esds involving l.s. planes. 
; 
 
loop_ 
 _geom_bond_atom_site_label_1 
 _geom_bond_atom_site_label_2 
 _geom_bond_distance 
 _geom_bond_site_symmetry_2 
 _geom_bond_publ_flag 
Sn1 Zn 2.5818(6) . ? 
Sn1 Na3 3.280(2) . ? 
Sn1 Na2 3.317(2) . ? 
Sn1 Na4 3.397(2) 1_545 ? 
Sn1 Na3 3.422(2) 4_575 ? 
Sn1 Na2 3.478(2) 4_576 ? 
Sn1 K1 3.6121(13) . ? 
Sn1 K2 3.6455(12) . ? 
Sn1 Na5 3.729(2) 2_544 ? 
Sn1 K1 3.8143(14) 2_655 ? 
Sn1 K2 3.9805(13) 3_665 ? 
Sn2 Zn 2.5560(6) . ? 
Sn2 Na5 3.285(2) 4_586 ? 
Sn2 Na4 3.300(2) 2_544 ? 
Sn2 Na3 3.328(2) 3_575 ? 
Sn2 Na4 3.369(2) . ? 
Sn2 Na5 3.393(2) . ? 
Sn2 Na2 3.482(2) 3_675 ? 
Sn2 K1 3.6344(13) 4_575 ? 
Sn2 Na1 3.6344(13) 4_575 ? 
Sn2 Na1 3.7283(14) 1_565 ? 
Sn2 K1 3.7283(14) 1_565 ? 
Sn2 K2 3.9326(13) 3_675 ? 
Zn Na5 3.065(2) 2_544 ? 
Zn Na3 3.117(2) 4_575 ? 
Zn Na2 3.199(2) 3_675 ? 
Zn K2 3.4011(13) 2_655 ? 
Zn Na2 3.593(2) . ? 
Zn K1 3.9548(14) 4_575 ? 
K1 Sn2 3.6344(13) 4_576 ? 
K1 Na4 3.636(2) 1_545 ? 
K1 Na2 3.640(2) 3_665 ? 
K1 Na2 3.692(3) 4_576 ? 
K1 K2 3.7167(18) 2_645 ? 
K1 Sn2 3.7282(14) 1_545 ? 
K1 Na2 3.737(2) 2_645 ? 
K1 Sn1 3.8142(14) 2_645 ? 
K1 Na3 3.843(2) . ? 
K1 Na5 3.913(3) 4_576 ? 
K1 Zn 3.9548(14) 4_576 ? 
K2 Zn 3.4011(13) 2_645 ? 
K2 Na3 3.604(3) 2_645 ? 
K2 Na4 3.664(2) 3_675 ? 
K2 Na1 3.7167(18) 2_655 ? 
K2 K1 3.7167(18) 2_655 ? 
K2 Na5 3.771(2) 3_675 ? 
K2 Na2 3.823(2) . ? 
K2 Na2 3.845(3) 3_665 ? 
K2 K2 3.912(3) 3_665 ? 
K2 Sn2 3.9327(13) 3_675 ? 
K2 Sn1 3.9805(13) 3_665 ? 
Na2 Zn 3.199(2) 3_675 ? 
Na2 Na3 3.454(3) 4_575 ? 
Na2 Sn1 3.478(2) 4_575 ? 
Na2 Sn2 3.482(2) 3_675 ? 
Na2 Na1 3.640(2) 3_665 ? 
Na2 K1 3.640(2) 3_665 ? 
Na2 Na1 3.692(3) 4_575 ? 
Na2 K1 3.692(3) 4_575 ? 
Na2 K1 3.737(2) 2_655 ? 
Na2 Na1 3.737(2) 2_655 ? 
Na3 Zn 3.117(2) 4_576 ? 
Na3 Sn2 3.328(2) 3_575 ? 
Na3 Na5 3.352(3) 2_544 ? 
Na3 Na4 3.406(3) 4_586 ? 
Na3 Sn1 3.422(2) 4_576 ? 
Na3 Na2 3.454(3) 4_576 ? 
Na3 Na4 3.466(3) 3_575 ? 
Na3 K2 3.604(3) 2_655 ? 
Na3 Na5 3.661(3) 3_575 ? 
Na4 Sn2 3.300(2) 2_554 ? 
Na4 Na5 3.394(3) 2_554 ? 
Na4 Sn1 3.397(2) 1_565 ? 
Na4 Na3 3.406(3) 4_585 ? 
Na4 Na3 3.466(3) 3_575 ? 
Na4 Na5 3.620(3) . ? 
Na4 Na1 3.636(2) 1_565 ? 
Na4 K1 3.636(2) 1_565 ? 
Na4 K2 3.664(2) 3_675 ? 
Na4 Na4 3.973(4) 3_585 ? 
Na4 Na3 4.176(3) 1_565 ? 
Na5 Zn 3.065(2) 2_554 ? 
Na5 Sn2 3.285(2) 4_585 ? 
Na5 Na3 3.352(3) 2_554 ? 
Na5 Na4 3.394(3) 2_544 ? 
Na5 Na5 3.549(5) 3_584 ? 
Na5 Na3 3.661(3) 3_575 ? 
Na5 Sn1 3.729(2) 2_554 ? 
Na5 K2 3.771(2) 3_675 ? 
Na5 K1 3.913(3) 4_575 ? 
Na5 Na1 3.913(3) 4_575 ? 
 
loop_ 
 _geom_angle_atom_site_label_1 
 _geom_angle_atom_site_label_2 
 _geom_angle_atom_site_label_3 
 _geom_angle 
 _geom_angle_site_symmetry_1 
 _geom_angle_site_symmetry_3 
 _geom_angle_publ_flag 
Zn Sn1 Na3 90.86(4) . . ? 
Zn Sn1 Na2 73.87(4) . . ? 
Na3 Sn1 Na2 163.22(5) . . ? 
Zn Sn1 Na4 103.29(4) . 1_545 ? 
Na3 Sn1 Na4 77.40(5) . 1_545 ? 
Na2 Sn1 Na4 112.37(5) . 1_545 ? 
Zn Sn1 Na3 60.67(4) . 4_575 ? 
Na3 Sn1 Na3 117.09(6) . 4_575 ? 
Na2 Sn1 Na3 61.64(5) . 4_575 ? 
Na4 Sn1 Na3 59.93(5) 1_545 4_575 ? 
Zn Sn1 Na2 117.62(4) . 4_576 ? 
Na3 Sn1 Na2 61.38(5) . 4_576 ? 
Na2 Sn1 Na2 119.36(6) . 4_576 ? 
Na4 Sn1 Na2 120.25(5) 1_545 4_576 ? 
Na3 Sn1 Na2 177.96(5) 4_575 4_576 ? 
Zn Sn1 K1 155.71(3) . . ? 
Na3 Sn1 K1 67.58(4) . . ? 
Na2 Sn1 K1 128.72(4) . . ? 
Na4 Sn1 K1 62.40(4) 1_545 . ? 
Na3 Sn1 K1 118.27(4) 4_575 . ? 
Na2 Sn1 K1 62.73(4) 4_576 . ? 
Zn Sn1 K2 135.80(3) . . ? 
Na3 Sn1 K2 124.74(4) . . ? 
Na2 Sn1 K2 66.43(4) . . ? 
Na4 Sn1 K2 109.04(4) 1_545 . ? 
Na3 Sn1 K2 112.32(4) 4_575 . ? 
Na2 Sn1 K2 69.65(4) 4_576 . ? 
K1 Sn1 K2 68.36(3) . . ? 
Zn Sn1 Na5 54.51(4) . 2_544 ? 
Na3 Sn1 Na5 56.71(5) . 2_544 ? 
Na2 Sn1 Na5 116.13(5) . 2_544 ? 
Na4 Sn1 Na5 56.67(5) 1_545 2_544 ? 
Na3 Sn1 Na5 61.42(5) 4_575 2_544 ? 
Na2 Sn1 Na5 116.80(5) 4_576 2_544 ? 
K1 Sn1 Na5 102.40(4) . 2_544 ? 
K2 Sn1 Na5 165.68(4) . 2_544 ? 
Zn Sn1 K1 85.55(2) . 2_655 ? 
Na3 Sn1 K1 110.05(4) . 2_655 ? 
Na2 Sn1 K1 62.75(4) . 2_655 ? 
Na4 Sn1 K1 168.60(4) 1_545 2_655 ? 
Na3 Sn1 K1 120.62(4) 4_575 2_655 ? 
Na2 Sn1 K1 59.67(4) 4_576 2_655 ? 
K1 Sn1 K1 111.65(2) . 2_655 ? 
K2 Sn1 K1 59.72(3) . 2_655 ? 
Na5 Sn1 K1 134.53(4) 2_544 2_655 ? 
Zn Sn1 K2 115.71(2) . 3_665 ? 
Na3 Sn1 K2 132.25(4) . 3_665 ? 
Na2 Sn1 K2 62.81(4) . 3_665 ? 
Na4 Sn1 K2 58.92(4) 1_545 3_665 ? 
Na3 Sn1 K2 57.68(4) 4_575 3_665 ? 
Na2 Sn1 K2 124.30(4) 4_576 3_665 ? 
K1 Sn1 K2 75.24(3) . 3_665 ? 
K2 Sn1 K2 61.54(3) . 3_665 ? 
Na5 Sn1 K2 106.19(4) 2_544 3_665 ? 
K1 Sn1 K2 110.88(3) 2_655 3_665 ? 
Zn Sn2 Na5 83.96(4) . 4_586 ? 
Zn Sn2 Na4 88.15(4) . 2_544 ? 
Na5 Sn2 Na4 97.61(5) 4_586 2_544 ? 
Zn Sn2 Na3 127.25(4) . 3_575 ? 
Na5 Sn2 Na3 60.91(5) 4_586 3_575 ? 
Na4 Sn2 Na3 61.83(5) 2_544 3_575 ? 
Zn Sn2 Na4 157.27(4) . . ? 
Na5 Sn2 Na4 85.13(6) 4_586 . ? 
Na4 Sn2 Na4 113.06(3) 2_544 . ? 
Na3 Sn2 Na4 62.33(5) 3_575 . ? 
Zn Sn2 Na5 136.84(4) . . ? 
Na5 Sn2 Na5 126.54(6) 4_586 . ? 
Na4 Sn2 Na5 60.93(6) 2_544 . ? 
Na3 Sn2 Na5 66.01(5) 3_575 . ? 
Na4 Sn2 Na5 64.74(5) . . ? 
Zn Sn2 Na2 61.76(4) . 3_675 ? 
Na5 Sn2 Na2 111.52(5) 4_586 3_675 ? 
Na4 Sn2 Na2 134.03(5) 2_544 3_675 ? 
Na3 Sn2 Na2 164.11(5) 3_575 3_675 ? 
Na4 Sn2 Na2 104.42(5) . 3_675 ? 
Na5 Sn2 Na2 118.01(5) . 3_675 ? 
Zn Sn2 K1 77.24(3) . 4_575 ? 
Na5 Sn2 K1 160.62(5) 4_586 4_575 ? 
Na4 Sn2 K1 77.31(4) 2_544 4_575 ? 
Na3 Sn2 K1 128.67(4) 3_575 4_575 ? 
Na4 Sn2 K1 114.13(4) . 4_575 ? 
Na5 Sn2 K1 67.57(4) . 4_575 ? 
Na2 Sn2 K1 63.31(4) 3_675 4_575 ? 
Zn Sn2 Na1 77.24(3) . 4_575 ? 
Na5 Sn2 Na1 160.62(5) 4_586 4_575 ? 
Na4 Sn2 Na1 77.31(4) 2_544 4_575 ? 
Na3 Sn2 Na1 128.67(4) 3_575 4_575 ? 
Na4 Sn2 Na1 114.13(4) . 4_575 ? 
Na5 Sn2 Na1 67.57(4) . 4_575 ? 
Na2 Sn2 Na1 63.31(4) 3_675 4_575 ? 
K1 Sn2 Na1 0.00(5) 4_575 4_575 ? 
Zn Sn2 Na1 95.97(3) . 1_565 ? 
Na5 Sn2 Na1 67.49(4) 4_586 1_565 ? 
Na4 Sn2 Na1 163.89(4) 2_544 1_565 ? 
Na3 Sn2 Na1 103.92(4) 3_575 1_565 ? 
Na4 Sn2 Na1 61.38(4) . 1_565 ? 
Na5 Sn2 Na1 122.31(5) . 1_565 ? 
Na2 Sn2 Na1 60.53(4) 3_675 1_565 ? 
K1 Sn2 Na1 118.78(4) 4_575 1_565 ? 
Na1 Sn2 Na1 118.78(4) 4_575 1_565 ? 
Zn Sn2 K1 95.97(3) . 1_565 ? 
Na5 Sn2 K1 67.49(4) 4_586 1_565 ? 
Na4 Sn2 K1 163.89(4) 2_544 1_565 ? 
Na3 Sn2 K1 103.92(4) 3_575 1_565 ? 
Na4 Sn2 K1 61.38(4) . 1_565 ? 
Na5 Sn2 K1 122.31(5) . 1_565 ? 
Na2 Sn2 K1 60.53(4) 3_675 1_565 ? 
K1 Sn2 K1 118.78(4) 4_575 1_565 ? 
Na1 Sn2 K1 118.78(4) 4_575 1_565 ? 
Na1 Sn2 K1 0.00(5) 1_565 1_565 ? 
Zn Sn2 K2 119.15(2) . 3_675 ? 
Na5 Sn2 K2 137.51(5) 4_586 3_675 ? 
Na4 Sn2 K2 116.85(4) 2_544 3_675 ? 
Na3 Sn2 K2 113.16(4) 3_575 3_675 ? 
Na4 Sn2 K2 59.64(4) . 3_675 ? 
Na5 Sn2 K2 61.43(4) . 3_675 ? 
Na2 Sn2 K2 61.73(4) 3_675 3_675 ? 
K1 Sn2 K2 58.68(3) 4_575 3_675 ? 
Na1 Sn2 K2 58.68(3) 4_575 3_675 ? 
Na1 Sn2 K2 74.58(3) 1_565 3_675 ? 
K1 Sn2 K2 74.58(3) 1_565 3_675 ? 
Sn2 Zn Sn1 173.70(3) . . ? 
Sn2 Zn Na5 91.80(5) . 2_544 ? 
Sn1 Zn Na5 82.17(5) . 2_544 ? 
Sn2 Zn Na3 103.40(4) . 4_575 ? 
Sn1 Zn Na3 73.11(4) . 4_575 ? 
Na5 Zn Na3 72.63(5) 2_544 4_575 ? 
Sn2 Zn Na2 73.50(4) . 3_675 ? 
Sn1 Zn Na2 112.77(4) . 3_675 ? 
Na5 Zn Na2 161.57(6) 2_544 3_675 ? 
Na3 Zn Na2 120.94(6) 4_575 3_675 ? 
Sn2 Zn K2 99.04(3) . 2_655 ? 
Sn1 Zn K2 83.48(3) . 2_655 ? 
Na5 Zn K2 95.86(4) 2_544 2_655 ? 
Na3 Zn K2 154.96(5) 4_575 2_655 ? 
Na2 Zn K2 76.09(4) 3_675 2_655 ? 
Sn2 Zn Na2 120.84(4) . . ? 
Sn1 Zn Na2 62.47(4) . . ? 
Na5 Zn Na2 127.79(6) 2_544 . ? 
Na3 Zn Na2 61.47(5) 4_575 . ? 
Na2 Zn Na2 70.36(6) 3_675 . ? 
K2 Zn Na2 115.19(4) 2_655 . ? 
Sn2 Zn K1 63.68(2) . 4_575 ? 
Sn1 Zn K1 118.11(3) . 4_575 ? 
Na5 Zn K1 121.81(5) 2_544 4_575 ? 
Na3 Zn K1 64.56(4) 4_575 4_575 ? 
Na2 Zn K1 61.92(4) 3_675 4_575 ? 
K2 Zn K1 137.39(3) 2_655 4_575 ? 
Na2 Zn K1 58.34(4) . 4_575 ? 
Sn1 K1 Sn2 125.37(4) . 4_576 ? 
Sn1 K1 Na4 55.90(4) . 1_545 ? 
Sn2 K1 Na4 106.16(5) 4_576 1_545 ? 
Sn1 K1 Na2 103.04(5) . 3_665 ? 
Sn2 K1 Na2 131.33(5) 4_576 3_665 ? 
Na4 K1 Na2 96.17(6) 1_545 3_665 ? 
Sn1 K1 Na2 56.86(4) . 4_576 ? 
Sn2 K1 Na2 94.31(4) 4_576 4_576 ? 
Na4 K1 Na2 108.90(6) 1_545 4_576 ? 
Na2 K1 Na2 118.72(4) 3_665 4_576 ? 
Sn1 K1 K2 169.78(5) . 2_645 ? 
Sn2 K1 K2 64.67(3) 4_576 2_645 ? 
Na4 K1 K2 126.14(5) 1_545 2_645 ? 
Na2 K1 K2 67.18(4) 3_665 2_645 ? 
Na2 K1 K2 124.25(5) 4_576 2_645 ? 
Sn1 K1 Sn2 101.78(3) . 1_545 ? 
Sn2 K1 Sn2 104.04(3) 4_576 1_545 ? 
Na4 K1 Sn2 54.43(4) 1_545 1_545 ? 
Na2 K1 Sn2 56.38(4) 3_665 1_545 ? 
Na2 K1 Sn2 157.91(5) 4_576 1_545 ? 
K2 K1 Sn2 75.62(3) 2_645 1_545 ? 
Sn1 K1 Na2 120.66(5) . 2_645 ? 
Sn2 K1 Na2 56.35(4) 4_576 2_645 ? 
Na4 K1 Na2 158.17(6) 1_545 2_645 ? 
Na2 K1 Na2 105.35(5) 3_665 2_645 ? 
Na2 K1 Na2 63.80(6) 4_576 2_645 ? 
K2 K1 Na2 61.72(4) 2_645 2_645 ? 
Sn2 K1 Na2 137.26(5) 1_545 2_645 ? 
Sn1 K1 Sn1 114.68(3) . 2_645 ? 
Sn2 K1 Sn1 102.04(3) 4_576 2_645 ? 
Na4 K1 Sn1 149.48(5) 1_545 2_645 ? 
Na2 K1 Sn1 55.57(4) 3_665 2_645 ? 
Na2 K1 Sn1 80.01(4) 4_576 2_645 ? 
K2 K1 Sn1 57.89(3) 2_645 2_645 ? 
Sn2 K1 Sn1 107.47(3) 1_545 2_645 ? 
Na2 K1 Sn1 52.10(3) 2_645 2_645 ? 
Sn1 K1 Na3 52.09(4) . . ? 
Sn2 K1 Na3 73.29(4) 4_576 . ? 
Na4 K1 Na3 67.82(5) 1_545 . ? 
Na2 K1 Na3 154.84(6) 3_665 . ? 
Na2 K1 Na3 54.52(5) 4_576 . ? 
K2 K1 Na3 137.86(5) 2_645 . ? 
Sn2 K1 Na3 119.15(5) 1_545 . ? 
Na2 K1 Na3 92.95(5) 2_645 . ? 
Sn1 K1 Na3 133.00(5) 2_645 . ? 
Sn1 K1 Na5 126.91(5) . 4_576 ? 
Sn2 K1 Na5 53.27(3) 4_576 4_576 ? 
Na4 K1 Na5 73.10(5) 1_545 4_576 ? 
Na2 K1 Na5 95.52(6) 3_665 4_576 ? 
Na2 K1 Na5 144.67(6) 4_576 4_576 ? 
K2 K1 Na5 59.17(4) 2_645 4_576 ? 
Sn2 K1 Na5 50.85(3) 1_545 4_576 ? 
Na2 K1 Na5 100.75(5) 2_645 4_576 ? 
Sn1 K1 Na5 116.84(5) 2_645 4_576 ? 
Na3 K1 Na5 97.90(5) . 4_576 ? 
Sn1 K1 Zn 93.73(3) . 4_576 ? 
Sn2 K1 Zn 39.077(16) 4_576 4_576 ? 
Na4 K1 Zn 109.31(5) 1_545 4_576 ? 
Na2 K1 Zn 154.38(5) 3_665 4_576 ? 
Na2 K1 Zn 55.92(4) 4_576 4_576 ? 
K2 K1 Zn 94.56(4) 2_645 4_576 ? 
Sn2 K1 Zn 138.86(4) 1_545 4_576 ? 
Na2 K1 Zn 49.05(4) 2_645 4_576 ? 
Sn1 K1 Zn 99.87(3) 2_645 4_576 ? 
Na3 K1 Zn 47.10(4) . 4_576 ? 
Na5 K1 Zn 89.53(4) 4_576 4_576 ? 
Zn K2 Na3 73.70(4) 2_645 2_645 ? 
Zn K2 Sn1 102.12(3) 2_645 . ? 
Na3 K2 Sn1 152.48(5) 2_645 . ? 
Zn K2 Na4 109.05(5) 2_645 3_675 ? 
Na3 K2 Na4 55.88(5) 2_645 3_675 ? 
Sn1 K2 Na4 145.10(5) . 3_675 ? 
Zn K2 Na1 83.26(4) 2_645 2_655 ? 
Na3 K2 Na1 141.04(5) 2_645 2_655 ? 
Sn1 K2 Na1 62.40(3) . 2_655 ? 
Na4 K2 Na1 105.61(5) 3_675 2_655 ? 
Zn K2 K1 83.26(4) 2_645 2_655 ? 
Na3 K2 K1 141.04(5) 2_645 2_655 ? 
Sn1 K2 K1 62.40(3) . 2_655 ? 
Na4 K2 K1 105.61(5) 3_675 2_655 ? 
Na1 K2 K1 0.00(5) 2_655 2_655 ? 
Zn K2 Na5 66.49(4) 2_645 3_675 ? 
Na3 K2 Na5 78.95(5) 2_645 3_675 ? 
Sn1 K2 Na5 125.15(5) . 3_675 ? 
Na4 K2 Na5 58.25(5) 3_675 3_675 ? 
Na1 K2 Na5 63.01(5) 2_655 3_675 ? 
K1 K2 Na5 63.01(5) 2_655 3_675 ? 
Zn K2 Na2 141.04(5) 2_645 . ? 
Na3 K2 Na2 143.03(6) 2_645 . ? 
Sn1 K2 Na2 52.66(3) . . ? 
Na4 K2 Na2 92.60(5) 3_675 . ? 
Na1 K2 Na2 59.40(4) 2_655 . ? 
K1 K2 Na2 59.40(4) 2_655 . ? 
Na5 K2 Na2 101.79(5) 3_675 . ? 
Zn K2 Na2 91.63(4) 2_645 3_665 ? 
Na3 K2 Na2 55.14(5) 2_645 3_665 ? 
Sn1 K2 Na2 98.53(4) . 3_665 ? 
Na4 K2 Na2 95.93(5) 3_675 3_665 ? 
Na1 K2 Na2 158.37(5) 2_655 3_665 ? 
K1 K2 Na2 158.37(5) 2_655 3_665 ? 
Na5 K2 Na2 133.52(6) 3_675 3_665 ? 
Na2 K2 Na2 118.65(5) . 3_665 ? 
Zn K2 K2 141.99(5) 2_645 3_665 ? 
Na3 K2 K2 102.66(6) 2_645 3_665 ? 
Sn1 K2 K2 63.45(3) . 3_665 ? 
Na4 K2 K2 98.39(5) 3_675 3_665 ? 
Na1 K2 K2 114.58(5) 2_655 3_665 ? 
K1 K2 K2 114.58(5) 2_655 3_665 ? 
Na5 K2 K2 151.21(6) 3_675 3_665 ? 
Na2 K2 K2 59.59(4) . 3_665 ? 
Na2 K2 K2 59.06(4) 3_665 3_665 ? 
Zn K2 Sn2 116.36(4) 2_645 3_675 ? 
Na3 K2 Sn2 106.61(4) 2_645 3_675 ? 
Sn1 K2 Sn2 99.61(3) . 3_675 ? 
Na4 K2 Sn2 52.50(4) 3_675 3_675 ? 
Na1 K2 Sn2 56.65(3) 2_655 3_675 ? 
K1 K2 Sn2 56.65(3) 2_655 3_675 ? 
Na5 K2 Sn2 52.21(4) 3_675 3_675 ? 
Na2 K2 Sn2 53.32(3) . 3_675 ? 
Na2 K2 Sn2 142.18(5) 3_665 3_675 ? 
K2 K2 Sn2 101.10(4) 3_665 3_675 ? 
Zn K2 Sn1 125.60(4) 2_645 3_665 ? 
Na3 K2 Sn1 53.35(4) 2_645 3_665 ? 
Sn1 K2 Sn1 118.45(3) . 3_665 ? 
Na4 K2 Sn1 52.57(4) 3_675 3_665 ? 
Na1 K2 Sn1 146.43(4) 2_655 3_665 ? 
K1 K2 Sn1 146.43(4) 2_655 3_665 ? 
Na5 K2 Sn1 109.52(4) 3_675 3_665 ? 
Na2 K2 Sn1 93.32(4) . 3_665 ? 
Na2 K2 Sn1 50.12(3) 3_665 3_665 ? 
K2 K2 Sn1 55.01(3) 3_665 3_665 ? 
Sn2 K2 Sn1 92.08(3) 3_675 3_665 ? 
Zn Na2 Sn1 131.72(7) 3_675 . ? 
Zn Na2 Na3 144.47(8) 3_675 4_575 ? 
Sn1 Na2 Na3 60.67(5) . 4_575 ? 
Zn Na2 Sn1 110.32(6) 3_675 4_575 ? 
Sn1 Na2 Sn1 114.47(6) . 4_575 ? 
Na3 Na2 Sn1 56.48(5) 4_575 4_575 ? 
Zn Na2 Sn2 44.74(3) 3_675 3_675 ? 
Sn1 Na2 Sn2 116.82(6) . 3_675 ? 
Na3 Na2 Sn2 170.34(8) 4_575 3_675 ? 
Sn1 Na2 Sn2 121.81(6) 4_575 3_675 ? 
Zn Na2 Zn 109.64(6) 3_675 . ? 
Sn1 Na2 Zn 43.65(3) . . ? 
Na3 Na2 Zn 52.47(5) 4_575 . ? 
Sn1 Na2 Zn 102.80(5) 4_575 . ? 
Sn2 Na2 Zn 133.26(6) 3_675 . ? 
Zn Na2 Na1 87.37(5) 3_675 3_665 ? 
Sn1 Na2 Na1 127.58(7) . 3_665 ? 
Na3 Na2 Na1 110.26(7) 4_575 3_665 ? 
Sn1 Na2 Na1 64.76(4) 4_575 3_665 ? 
Sn2 Na2 Na1 63.09(4) 3_675 3_665 ? 
Zn Na2 Na1 162.11(7) . 3_665 ? 
Zn Na2 K1 87.37(5) 3_675 3_665 ? 
Sn1 Na2 K1 127.58(7) . 3_665 ? 
Na3 Na2 K1 110.26(7) 4_575 3_665 ? 
Sn1 Na2 K1 64.76(4) 4_575 3_665 ? 
Sn2 Na2 K1 63.09(4) 3_675 3_665 ? 
Zn Na2 K1 162.11(7) . 3_665 ? 
Na1 Na2 K1 0.00(3) 3_665 3_665 ? 
Zn Na2 Na1 79.81(5) 3_675 4_575 ? 
Sn1 Na2 Na1 107.33(6) . 4_575 ? 
Na3 Na2 Na1 64.96(5) 4_575 4_575 ? 
Sn1 Na2 Na1 60.41(4) 4_575 4_575 ? 
Sn2 Na2 Na1 123.53(6) 3_675 4_575 ? 
Zn Na2 Na1 65.74(4) . 4_575 ? 
Na1 Na2 Na1 113.88(5) 3_665 4_575 ? 
K1 Na2 Na1 113.88(5) 3_665 4_575 ? 
Zn Na2 K1 79.81(5) 3_675 4_575 ? 
Sn1 Na2 K1 107.33(6) . 4_575 ? 
Na3 Na2 K1 64.96(5) 4_575 4_575 ? 
Sn1 Na2 K1 60.41(4) 4_575 4_575 ? 
Sn2 Na2 K1 123.53(6) 3_675 4_575 ? 
Zn Na2 K1 65.74(4) . 4_575 ? 
Na1 Na2 K1 113.88(5) 3_665 4_575 ? 
K1 Na2 K1 113.88(5) 3_665 4_575 ? 
Na1 Na2 K1 0.00(5) 4_575 4_575 ? 
Zn Na2 K1 69.02(4) 3_675 2_655 ? 
Sn1 Na2 K1 65.15(4) . 2_655 ? 
Na3 Na2 K1 121.94(7) 4_575 2_655 ? 
Sn1 Na2 K1 176.51(7) 4_575 2_655 ? 
Sn2 Na2 K1 60.34(4) 3_675 2_655 ? 
Zn Na2 K1 74.47(4) . 2_655 ? 
Na1 Na2 K1 118.41(7) 3_665 2_655 ? 
K1 Na2 K1 118.41(7) 3_665 2_655 ? 
Na1 Na2 K1 116.20(6) 4_575 2_655 ? 
K1 Na2 K1 116.20(6) 4_575 2_655 ? 
Zn Na2 Na1 69.02(4) 3_675 2_655 ? 
Sn1 Na2 Na1 65.15(4) . 2_655 ? 
Na3 Na2 Na1 121.94(7) 4_575 2_655 ? 
Sn1 Na2 Na1 176.51(7) 4_575 2_655 ? 
Sn2 Na2 Na1 60.34(4) 3_675 2_655 ? 
Zn Na2 Na1 74.47(4) . 2_655 ? 
Na1 Na2 Na1 118.41(7) 3_665 2_655 ? 
K1 Na2 Na1 118.41(7) 3_665 2_655 ? 
Na1 Na2 Na1 116.20(6) 4_575 2_655 ? 
K1 Na2 Na1 116.20(6) 4_575 2_655 ? 
K1 Na2 Na1 0.00(6) 2_655 2_655 ? 
Zn Na3 Sn1 119.50(6) 4_576 . ? 
Zn Na3 Sn2 109.59(6) 4_576 3_575 ? 
Sn1 Na3 Sn2 127.24(6) . 3_575 ? 
Zn Na3 Na5 159.64(9) 4_576 2_544 ? 
Sn1 Na3 Na5 68.41(5) . 2_544 ? 
Sn2 Na3 Na5 58.90(5) 3_575 2_544 ? 
Zn Na3 Na4 92.49(6) 4_576 4_586 ? 
Sn1 Na3 Na4 131.97(8) . 4_586 ? 
Sn2 Na3 Na4 58.68(5) 3_575 4_586 ? 
Na5 Na3 Na4 94.31(7) 2_544 4_586 ? 
Zn Na3 Sn1 46.22(3) 4_576 4_576 ? 
Sn1 Na3 Sn1 117.00(6) . 4_576 ? 
Sn2 Na3 Sn1 110.26(6) 3_575 4_576 ? 
Na5 Na3 Sn1 150.42(8) 2_544 4_576 ? 
Na4 Na3 Sn1 59.68(5) 4_586 4_576 ? 
Zn Na3 Na2 66.06(5) 4_576 4_576 ? 
Sn1 Na3 Na2 62.14(5) . 4_576 ? 
Sn2 Na3 Na2 167.22(8) 3_575 4_576 ? 
Na5 Na3 Na2 128.87(8) 2_544 4_576 ? 
Na4 Na3 Na2 108.82(7) 4_586 4_576 ? 
Sn1 Na3 Na2 57.68(5) 4_576 4_576 ? 
Zn Na3 Na4 77.03(6) 4_576 3_575 ? 
Sn1 Na3 Na4 113.14(7) . 3_575 ? 
Sn2 Na3 Na4 59.41(5) 3_575 3_575 ? 
Na5 Na3 Na4 82.61(7) 2_544 3_575 ? 
Na4 Na3 Na4 108.11(6) 4_586 3_575 ? 
Sn1 Na3 Na4 117.07(7) 4_576 3_575 ? 
Na2 Na3 Na4 127.97(8) 4_576 3_575 ? 
Zn Na3 K2 112.84(6) 4_576 2_655 ? 
Sn1 Na3 K2 71.49(4) . 2_655 ? 
Sn2 Na3 K2 107.02(6) 3_575 2_655 ? 
Na5 Na3 K2 87.30(7) 2_544 2_655 ? 
Na4 Na3 K2 62.95(6) 4_586 2_655 ? 
Sn1 Na3 K2 68.97(4) 4_576 2_655 ? 
Na2 Na3 K2 65.97(5) 4_576 2_655 ? 
Na4 Na3 K2 166.05(8) 3_575 2_655 ? 
Zn Na3 Na5 53.02(5) 4_576 3_575 ? 
Sn1 Na3 Na5 170.35(8) . 3_575 ? 
Sn2 Na3 Na5 57.84(5) 3_575 3_575 ? 
Na5 Na3 Na5 116.44(8) 2_544 3_575 ? 
Na4 Na3 Na5 57.28(6) 4_586 3_575 ? 
Sn1 Na3 Na5 63.42(5) 4_576 3_575 ? 
Na2 Na3 Na5 114.43(7) 4_576 3_575 ? 
Na4 Na3 Na5 60.97(6) 3_575 3_575 ? 
K2 Na3 Na5 116.16(7) 2_655 3_575 ? 
Zn Na3 K1 68.34(4) 4_576 . ? 
Sn1 Na3 K1 60.33(4) . . ? 
Sn2 Na3 K1 130.34(7) 3_575 . ? 
Na5 Na3 K1 105.15(7) 2_544 . ? 
Na4 Na3 K1 160.38(8) 4_586 . ? 
Sn1 Na3 K1 101.97(5) 4_576 . ? 
Na2 Na3 K1 60.52(5) 4_576 . ? 
Na4 Na3 K1 72.64(6) 3_575 . ? 
K2 Na3 K1 119.58(6) 2_655 . ? 
Na5 Na3 K1 110.02(7) 3_575 . ? 
Sn2 Na4 Sn2 125.77(7) 2_554 . ? 
Sn2 Na4 Na5 60.88(5) 2_554 2_554 ? 
Sn2 Na4 Na5 168.05(8) . 2_554 ? 
Sn2 Na4 Sn1 111.56(6) 2_554 1_565 ? 
Sn2 Na4 Sn1 114.69(6) . 1_565 ? 
Na5 Na4 Sn1 66.60(5) 2_554 1_565 ? 
Sn2 Na4 Na3 59.48(5) 2_554 4_585 ? 
Sn2 Na4 Na3 126.38(7) . 4_585 ? 
Na5 Na4 Na3 65.15(6) 2_554 4_585 ? 
Sn1 Na4 Na3 60.39(5) 1_565 4_585 ? 
Sn2 Na4 Na3 82.57(6) 2_554 3_575 ? 
Sn2 Na4 Na3 58.26(5) . 3_575 ? 
Na5 Na4 Na3 116.98(8) 2_554 3_575 ? 
Sn1 Na4 Na3 163.65(8) 1_565 3_575 ? 
Na3 Na4 Na3 135.96(7) 4_585 3_575 ? 
Sn2 Na4 Na5 71.51(6) 2_554 . ? 
Sn2 Na4 Na5 57.95(5) . . ? 
Na5 Na4 Na5 131.47(8) 2_554 . ? 
Sn1 Na4 Na5 128.91(7) 1_565 . ? 
Na3 Na4 Na5 83.70(7) 4_585 . ? 
Na3 Na4 Na5 62.18(6) 3_575 . ? 
Sn2 Na4 Na1 169.77(7) 2_554 1_565 ? 
Sn2 Na4 Na1 64.19(4) . 1_565 ? 
Na5 Na4 Na1 108.90(7) 2_554 1_565 ? 
Sn1 Na4 Na1 61.70(4) 1_565 1_565 ? 
Na3 Na4 Na1 118.05(7) 4_585 1_565 ? 
Na3 Na4 Na1 103.11(7) 3_575 1_565 ? 
Na5 Na4 Na1 118.63(7) . 1_565 ? 
Sn2 Na4 K1 169.77(7) 2_554 1_565 ? 
Sn2 Na4 K1 64.19(4) . 1_565 ? 
Na5 Na4 K1 108.90(7) 2_554 1_565 ? 
Sn1 Na4 K1 61.70(4) 1_565 1_565 ? 
Na3 Na4 K1 118.05(7) 4_585 1_565 ? 
Na3 Na4 K1 103.11(7) 3_575 1_565 ? 
Na5 Na4 K1 118.63(7) . 1_565 ? 
Na1 Na4 K1 0.00(5) 1_565 1_565 ? 
Sn2 Na4 K2 106.25(6) 2_554 3_675 ? 
Sn2 Na4 K2 67.86(4) . 3_675 ? 
Na5 Na4 K2 121.73(7) 2_554 3_675 ? 
Sn1 Na4 K2 68.51(4) 1_565 3_675 ? 
Na3 Na4 K2 61.17(5) 4_585 3_675 ? 
Na3 Na4 K2 116.68(7) 3_575 3_675 ? 
Na5 Na4 K2 62.35(5) . 3_675 ? 
Na1 Na4 K2 79.02(5) 1_565 3_675 ? 
K1 Na4 K2 79.02(5) 1_565 3_675 ? 
Sn2 Na4 Na4 105.71(8) 2_554 3_585 ? 
Sn2 Na4 Na4 93.33(7) . 3_585 ? 
Na5 Na4 Na4 74.85(7) 2_554 3_585 ? 
Sn1 Na4 Na4 99.33(8) 1_565 3_585 ? 
Na3 Na4 Na4 139.62(10) 4_585 3_585 ? 
Na3 Na4 Na4 67.90(7) 3_575 3_585 ? 
Na5 Na4 Na4 129.98(9) . 3_585 ? 
Na1 Na4 Na4 69.38(6) 1_565 3_585 ? 
K1 Na4 Na4 69.38(6) 1_565 3_585 ? 
K2 Na4 Na4 148.04(9) 3_675 3_585 ? 
Sn2 Na4 Na3 111.41(6) 2_554 1_565 ? 
Sn2 Na4 Na3 119.46(6) . 1_565 ? 
Na5 Na4 Na3 51.30(5) 2_554 1_565 ? 
Sn1 Na4 Na3 50.04(4) 1_565 1_565 ? 
Na3 Na4 Na3 97.37(5) 4_585 1_565 ? 
Na3 Na4 Na3 118.16(7) 3_575 1_565 ? 
Na5 Na4 Na3 177.05(8) . 1_565 ? 
Na1 Na4 Na3 58.45(5) 1_565 1_565 ? 
K1 Na4 Na3 58.45(5) 1_565 1_565 ? 
K2 Na4 Na3 115.76(6) 3_675 1_565 ? 
Na4 Na4 Na3 50.26(6) 3_585 1_565 ? 
Zn Na5 Sn2 129.65(7) 2_554 4_585 ? 
Zn Na5 Na3 81.74(6) 2_554 2_554 ? 
Sn2 Na5 Na3 60.19(5) 4_585 2_554 ? 
Zn Na5 Sn2 109.24(6) 2_554 . ? 
Sn2 Na5 Sn2 120.72(6) 4_585 . ? 
Na3 Na5 Sn2 133.46(8) 2_554 . ? 
Zn Na5 Na4 93.65(7) 2_554 2_544 ? 
Sn2 Na5 Na4 106.62(7) 4_585 2_544 ? 
Na3 Na5 Na4 76.48(7) 2_554 2_544 ? 
Sn2 Na5 Na4 58.19(5) . 2_544 ? 
Zn Na5 Na5 72.80(7) 2_554 3_584 ? 
Sn2 Na5 Na5 72.62(6) 4_585 3_584 ? 
Na3 Na5 Na5 85.58(8) 2_554 3_584 ? 
Sn2 Na5 Na5 140.93(10) . 3_584 ? 
Na4 Na5 Na5 159.02(11) 2_544 3_584 ? 
Zn Na5 Na4 75.35(6) 2_554 . ? 
Sn2 Na5 Na4 137.32(8) 4_585 . ? 
Na3 Na5 Na4 157.09(8) 2_554 . ? 
Sn2 Na5 Na4 57.31(5) . . ? 
Na4 Na5 Na4 104.91(6) 2_544 . ? 
Na5 Na5 Na4 87.44(9) 3_584 . ? 
Zn Na5 Na3 54.35(5) 2_554 3_575 ? 
Sn2 Na5 Na3 163.84(9) 4_585 3_575 ? 
Na3 Na5 Na3 109.13(7) 2_554 3_575 ? 
Sn2 Na5 Na3 56.15(4) . 3_575 ? 
Na4 Na5 Na3 57.57(6) 2_544 3_575 ? 
Na5 Na5 Na3 120.59(10) 3_584 3_575 ? 
Na4 Na5 Na3 56.85(6) . 3_575 ? 
Zn Na5 Sn1 43.31(3) 2_554 2_554 ? 
Sn2 Na5 Sn1 115.01(6) 4_585 2_554 ? 
Na3 Na5 Sn1 54.88(5) 2_554 2_554 ? 
Sn2 Na5 Sn1 102.00(6) . 2_554 ? 
Na4 Na5 Sn1 56.74(5) 2_544 2_554 ? 
Na5 Na5 Sn1 103.89(8) 3_584 2_554 ? 
Na4 Na5 Sn1 106.15(6) . 2_554 ? 
Na3 Na5 Sn1 55.16(4) 3_575 2_554 ? 
Zn Na5 K2 128.80(7) 2_554 3_675 ? 
Sn2 Na5 K2 80.30(5) 4_585 3_675 ? 
Na3 Na5 K2 140.48(7) 2_554 3_675 ? 
Sn2 Na5 K2 66.35(4) . 3_675 ? 
Na4 Na5 K2 118.83(7) 2_544 3_675 ? 
Na5 Na5 K2 82.00(8) 3_584 3_675 ? 
Na4 Na5 K2 59.40(5) . 3_675 ? 
Na3 Na5 K2 109.50(6) 3_575 3_675 ? 
Sn1 Na5 K2 164.56(6) 2_554 3_675 ? 
Zn Na5 K1 165.12(8) 2_554 4_575 ? 
Sn2 Na5 K1 61.67(4) 4_585 4_575 ? 
Na3 Na5 K1 99.66(7) 2_554 4_575 ? 
Sn2 Na5 K1 59.16(4) . 4_575 ? 
Na4 Na5 K1 72.47(6) 2_544 4_575 ? 
Na5 Na5 K1 122.03(9) 3_584 4_575 ? 
Na4 Na5 K1 102.55(6) . 4_575 ? 
Na3 Na5 K1 111.90(7) 3_575 4_575 ? 
Sn1 Na5 K1 126.23(7) 2_554 4_575 ? 
K2 Na5 K1 57.82(4) 3_675 4_575 ? 
Zn Na5 Na1 165.12(8) 2_554 4_575 ? 
Sn2 Na5 Na1 61.67(4) 4_585 4_575 ? 
Na3 Na5 Na1 99.66(7) 2_554 4_575 ? 
Sn2 Na5 Na1 59.16(4) . 4_575 ? 
Na4 Na5 Na1 72.47(6) 2_544 4_575 ? 
Na5 Na5 Na1 122.03(9) 3_584 4_575 ? 
Na4 Na5 Na1 102.55(6) . 4_575 ? 
Na3 Na5 Na1 111.90(7) 3_575 4_575 ? 
Sn1 Na5 Na1 126.23(7) 2_554 4_575 ? 
K2 Na5 Na1 57.82(4) 3_675 4_575 ? 
K1 Na5 Na1 0.00(4) 4_575 4_575 ? 
 
_diffrn_measured_fraction_theta_max    0.997 
_diffrn_reflns_theta_full              27.85 
_diffrn_measured_fraction_theta_full   0.997 
_refine_diff_density_max    0.867 
_refine_diff_density_min   -0.974 
_refine_diff_density_rms    0.160 
